# Supplementary material for: Projecting the response of Greenland's peripheral glaciers to future climate change: glacier losses, sea level impact, freshwater contributions, and peak water timing
Source: Copernicus journal article supplement (doi:10.5194/tc-20-875-2026), 2026-02-03
Supplement: Supplementary file 1 [file tc-20-875-2026-supplement.pdf]

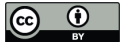

*Supplement of*

**Projecting the response of Greenland’s peripheral glaciers to future climate change: glacier losses, sea level impact, freshwater contributions, and peak water timing**

**Muhammad Shafeeque et al.**

*Correspondence to:* Muhammad Shafeeque ([shafeequ@uni-bremen.de](mailto:shafeequ@uni-bremen.de)) and Ben Marzeion ([ben.marzeion@uni-bremen.de](mailto:ben.marzeion@uni-bremen.de))

The copyright of individual parts of the supplement might differ from the article licence.

# Supplementary Information

## Sect. S1. Validation of ERA5 Scaled Precipitation Against WRF High-Resolution Data

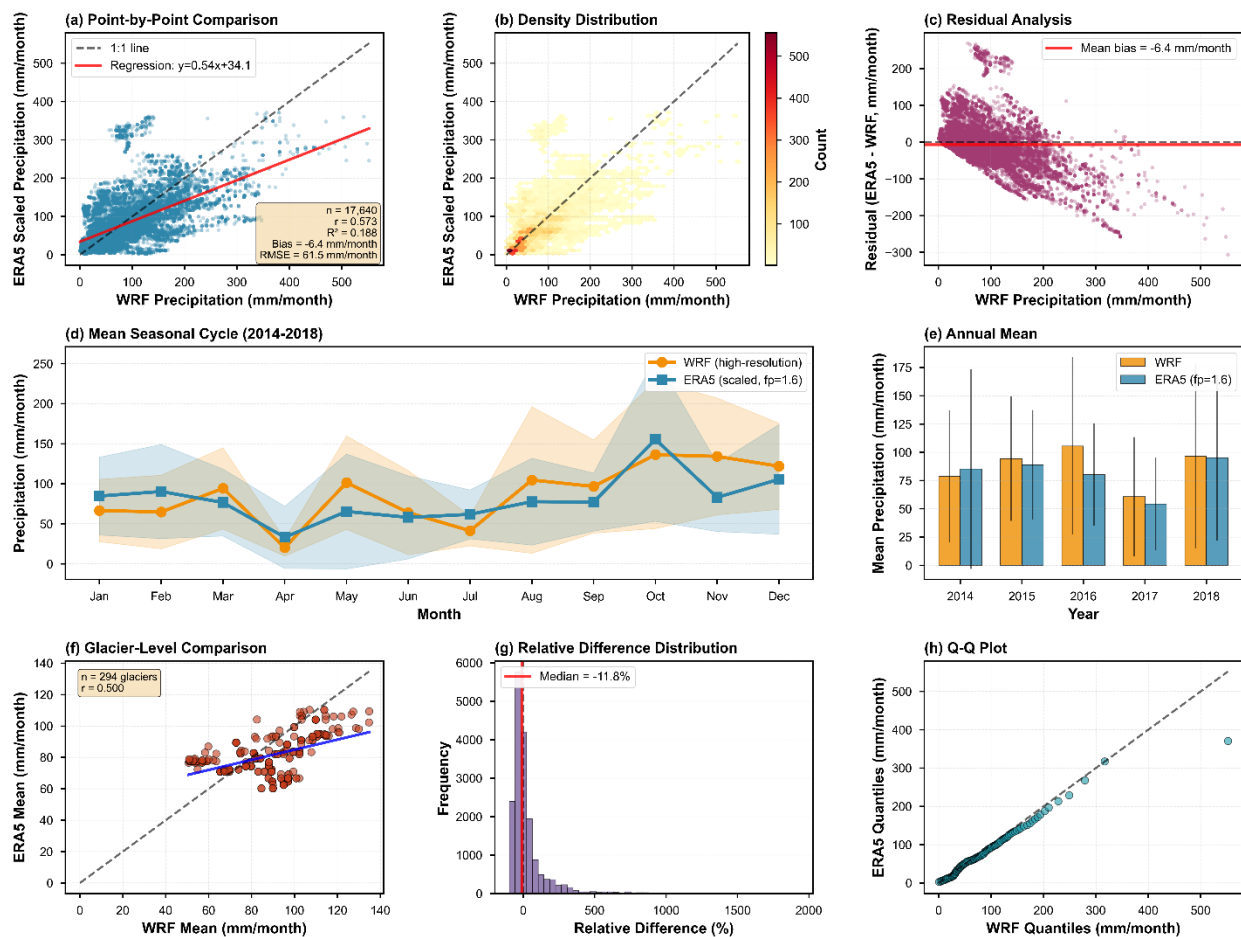

**Figure S1: Validation of precipitation scaling factor ( $fp = 1.6$ ) against WRF high-resolution data for regional application.** (a) Point-by-point comparison showing moderate correlation ( $r = 0.57$ ) and small systematic underestimation. The regression line ( $y = 0.54x + 34.1$ ) indicates reasonable linear relationship with slight bias. (b) Density distribution revealing concentration of data points near 1:1 line at lower precipitation rates. (c) Residual analysis demonstrates small mean bias (6.4 mm per month) with no systematic pattern versus precipitation magnitude. (d) Mean seasonal cycle (2014-2018) showing ERA5 ( $fp = 1.6$ ) captures seasonal pattern but systematically underestimates peak months. Shaded areas represent  $\pm 1$  standard deviation. (e) Annual means demonstrating similar interannual variability between datasets. Error bars show  $\pm 1$  standard deviation. (f) Glacier-level comparison ( $n = 294$ ) revealing consistent underestimation across spatial domain ( $r = 0.50$ ). (g) Relative difference distribution showing median underestimation of 11.8%. (h) Quantile-quantile plot demonstrates reasonable agreement across precipitation distribution with slight bias toward underestimation at higher values.

## Sect. S2. OGGM Parameters

**Table S1.** OGGM Parameters for Greenland Peripheral Glaciers.

| Category                       | Parameter                      | Symbol       | Value / Range                                                                | Type       | Calibration Method                                                                   | Source / Reference                         |
|--------------------------------|--------------------------------|--------------|------------------------------------------------------------------------------|------------|--------------------------------------------------------------------------------------|--------------------------------------------|
| <b>Mass Balance Parameters</b> | Precipitation factor           | $f_p$        | 1.6                                                                          | Fixed      | Global calibration against WGMS reference glaciers                                   | Maussion et al. (2019)                     |
|                                | Temperature sensitivity        | $\mu$        | Glacier-specific (median: 5.0 mm w.e. /K month <sup>-1</sup> , range: 0–200) | Calibrated | Individual calibration using geodetic mass balance and frontal ablation observations | This study, following Malles et al. (2023) |
|                                | Melt temperature threshold     | $T_{melt}$   | -1 °C                                                                        | Fixed      | Standard OGGM default                                                                | Maussion et al. (2019)                     |
|                                | Temperature lapse rate         | $\gamma$     | -6.5 K km <sup>-1</sup>                                                      | Fixed      | Regional calibration for Arctic applications                                         | OGGM default                               |
|                                | Solid precipitation threshold  | $T_{solid}$  | 0 °C                                                                         | Fixed      | Standard OGGM default                                                                | Maussion et al. (2019)                     |
|                                | Liquid precipitation threshold | $T_{liquid}$ | 2 °C                                                                         | Fixed      | Standard OGGM default                                                                | Maussion et al. (2019)                     |
| <b>Ice Dynamics Parameters</b> | Glen's flow law exponent       | $n$          | 3                                                                            | Fixed      | Standard ice rheology                                                                | Glen (1955)                                |
|                                | Ice density                    | $\rho_{ice}$ | 900 kg m <sup>-3</sup>                                                       | Fixed      | Standard value                                                                       | Cuffey and Paterson (2010)                 |
|                                | Glen's creep parameter         | $A$          | $2.4 \times 10^{-24} \text{ Pa}^{-3} \text{ s}^{-1}$                         | Fixed      | Standard for temperate ice                                                           | Cuffey and Paterson (2010)                 |
|                                | Sliding parameter              | $f_s$        | $10^{-20} \text{ m}^2 \text{ Pa}^{-3} \text{ s}^{-1}$                        | Fixed      | Maintain numerical stabilities                                                       | Malles et al. (2023)                       |

|                                    |                          |                    |                                                   |            |                                                          |                                            |
|------------------------------------|--------------------------|--------------------|---------------------------------------------------|------------|----------------------------------------------------------|--------------------------------------------|
| <b>Frontal Ablation Parameters</b> | Water-depth sensitivity  | $k$                | Glacier-specific (median: 0.65 yr/, range: 0-3.0) | Calibrated | Iterative calibration to match observed frontal ablation | This study, following Malles et al. (2023) |
|                                    | Ocean water density      | $\rho_o C_{ocean}$ | 1028 kg m <sup>-3</sup>                           | Fixed      | Standard ocean water density                             | —                                          |
|                                    | Fraction below waterline | $f_{bwl}$          | 0.75                                              | Fixed      | Assumption for volume retreat below waterline            | Malles et al. (2023)                       |
| <b>Numerical Parameters</b>        | Grid resolution          | $\Delta x$         | 14 $\sqrt{S}$ + 10 m (bound: 10-200 m)            | Dynamic    | Automatic based on glacier area $S$ (km <sup>2</sup> )   | Maussion et al. (2019)                     |
|                                    | Time step                | $\Delta t$         | 0.02 years                                        | Fixed      | Numerical stability requirement                          | OGGM default                               |

### Sect. S3. Glacier Count & Area vs Elevation

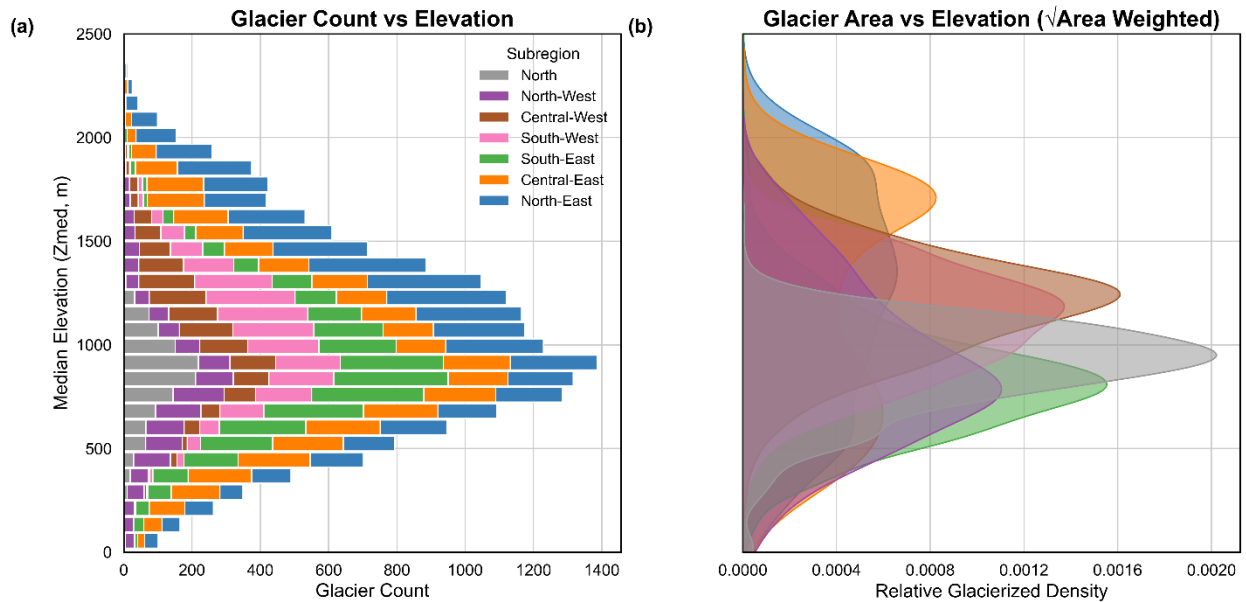

**Figure S2.** Elevation distribution of Greenland’s peripheral glaciers by subregion. (a) Glacier count as a function of median glacier elevation ( $Z_{med}$ , m) for each subregion. (b) Glacier area distribution with elevation, expressed as the square-root area-weighted relative glacierized density for each subregion.

## Sect. S4. Initial Glacier Area & Elevation vs. Glacier Losses

### Sect. S4.1. Remaining Glacier Area

**Figure S3-S10. Remaining Glacier Area by 2100 (%) across subregions and emission scenarios.** Each panel shows the projected remaining glacier area by 2100 relative to 2020 under four SSP scenarios (SSP126, SSP245, SSP370, SSP585). The results are presented for (S3) Greenland-All, (S4) North, (S5) North-East, (S6) North-West, (S7) Central-East, (S8) Central-West, (S9) South-East, and (S10) South-West subregions. Glaciers are grouped by their initial area based on RIG v6.0 (x-axis) and median elevation (y-axis). Values within each grid cell denote the median percentage of remaining glacier area by 2100, with the number of glaciers in parentheses.

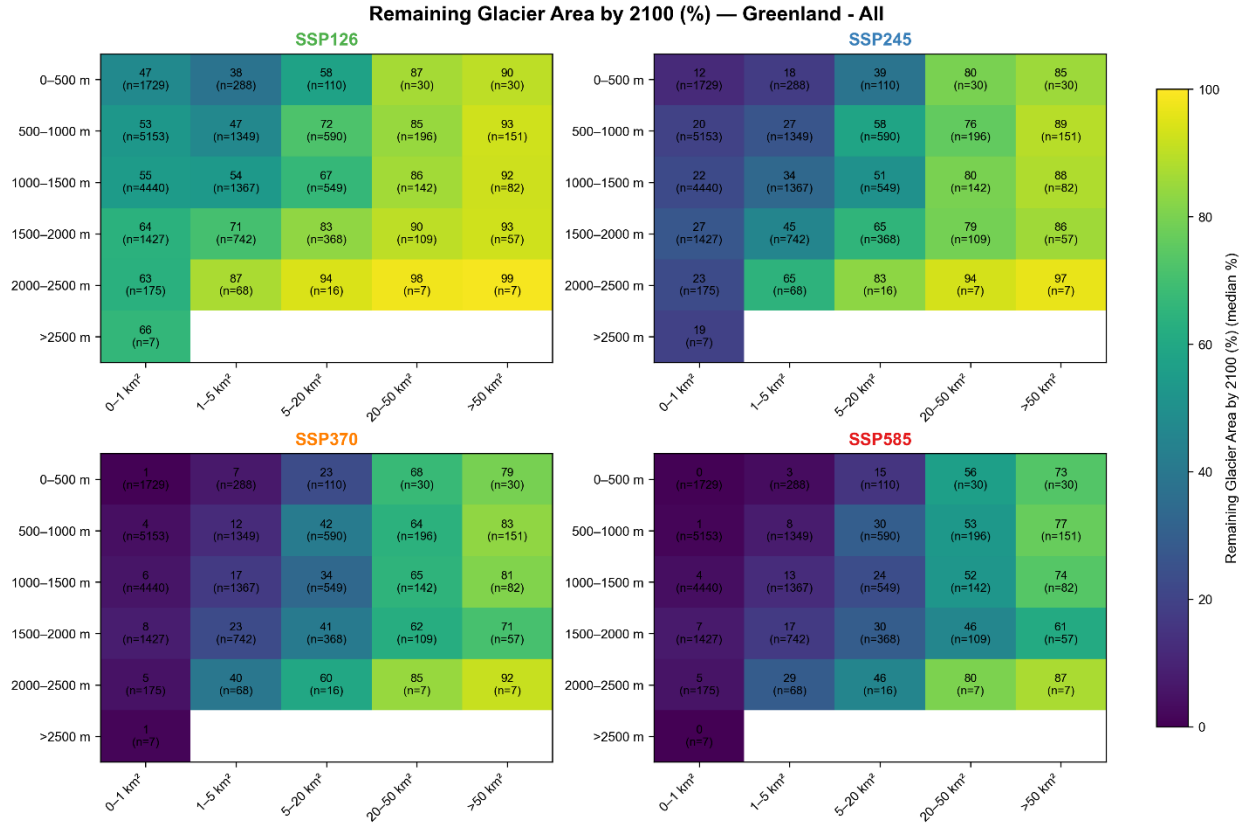

### Remaining Glacier Area by 2100 (%) — North

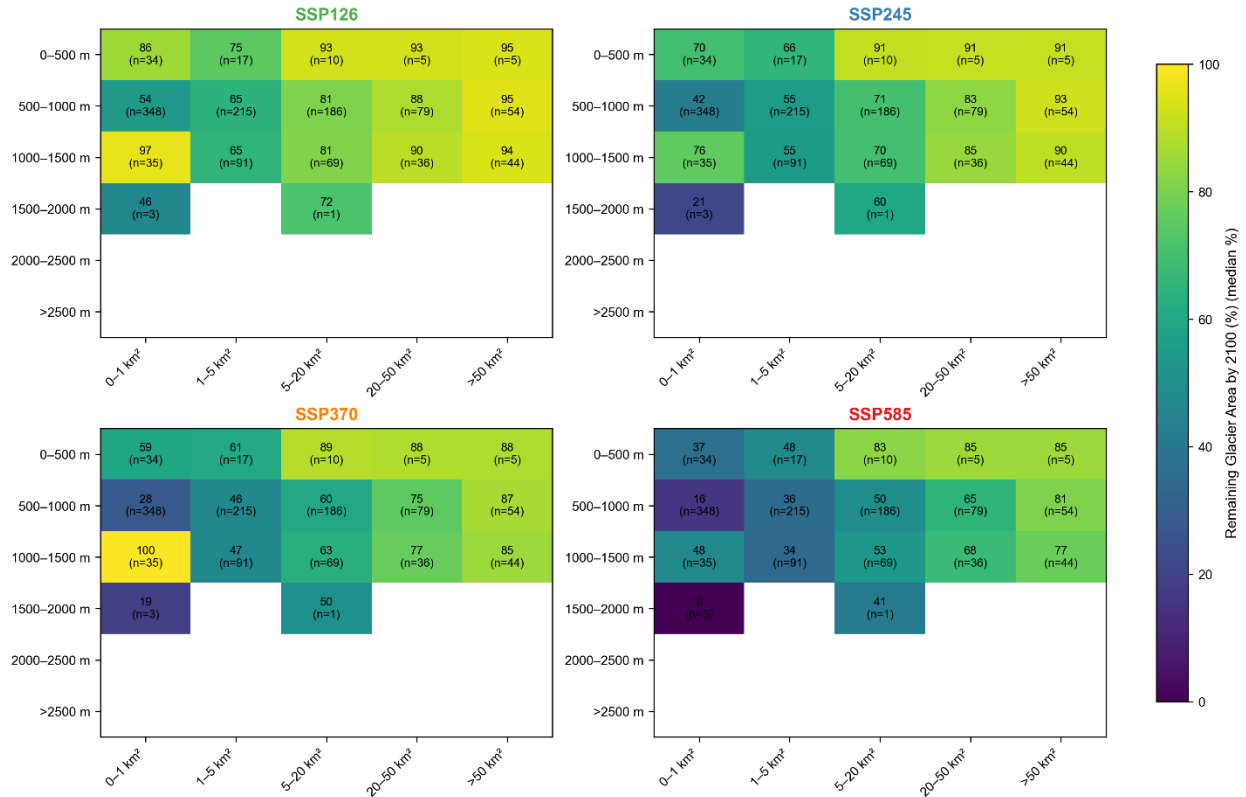

### Remaining Glacier Area by 2100 (%) — North-East

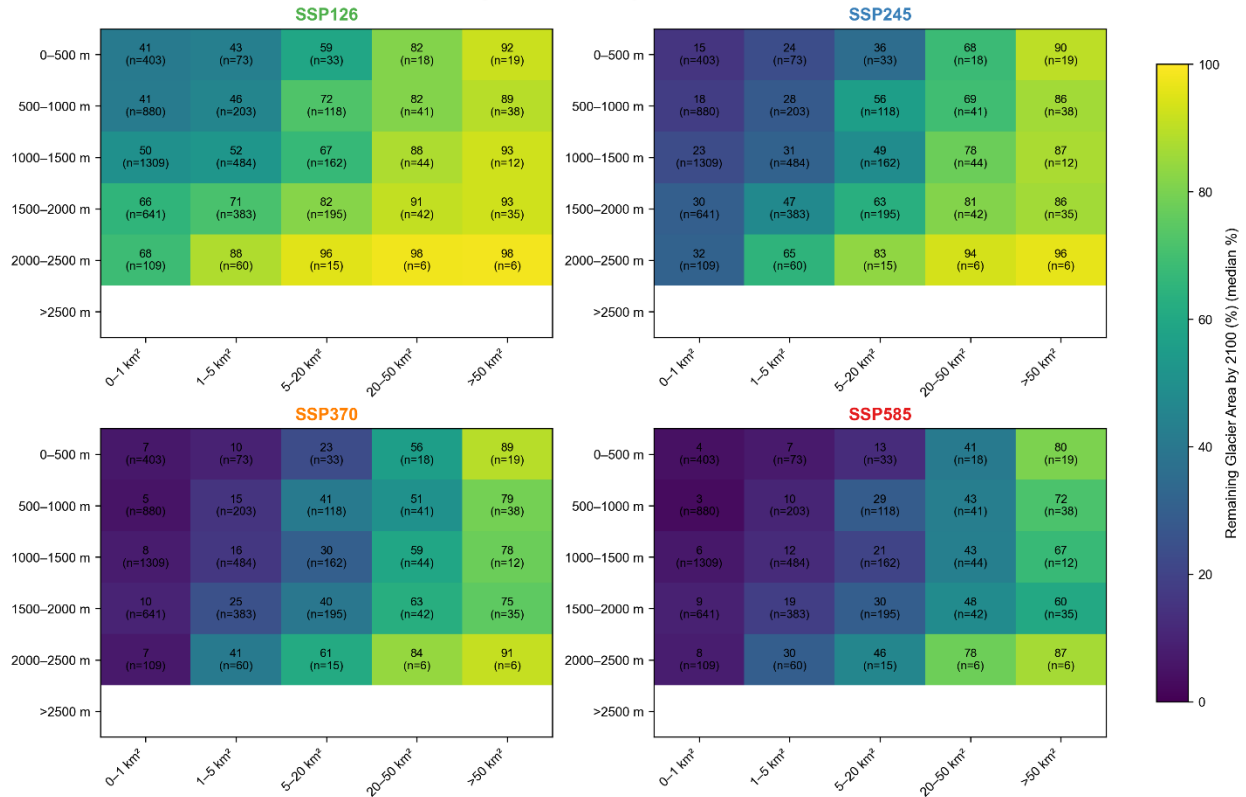

### Remaining Glacier Area by 2100 (%) — North-West

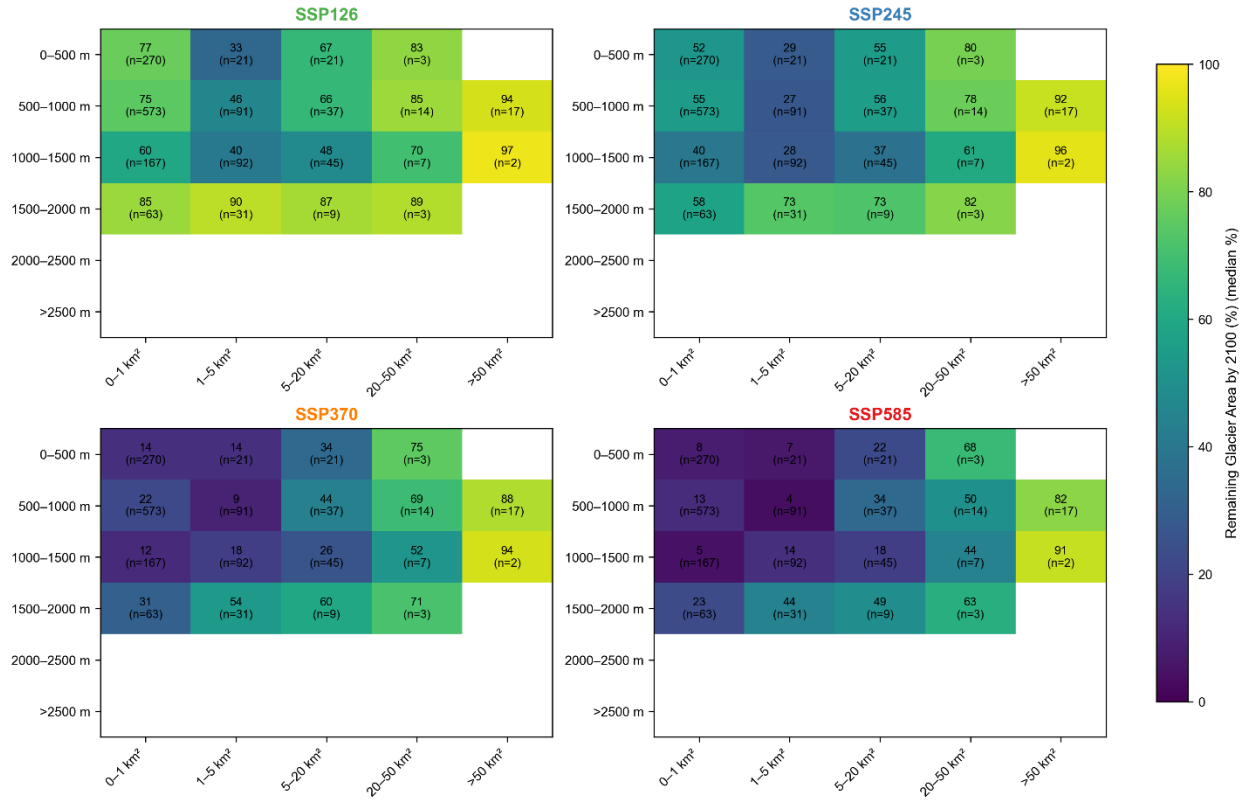

### Remaining Glacier Area by 2100 (%) — Central-East

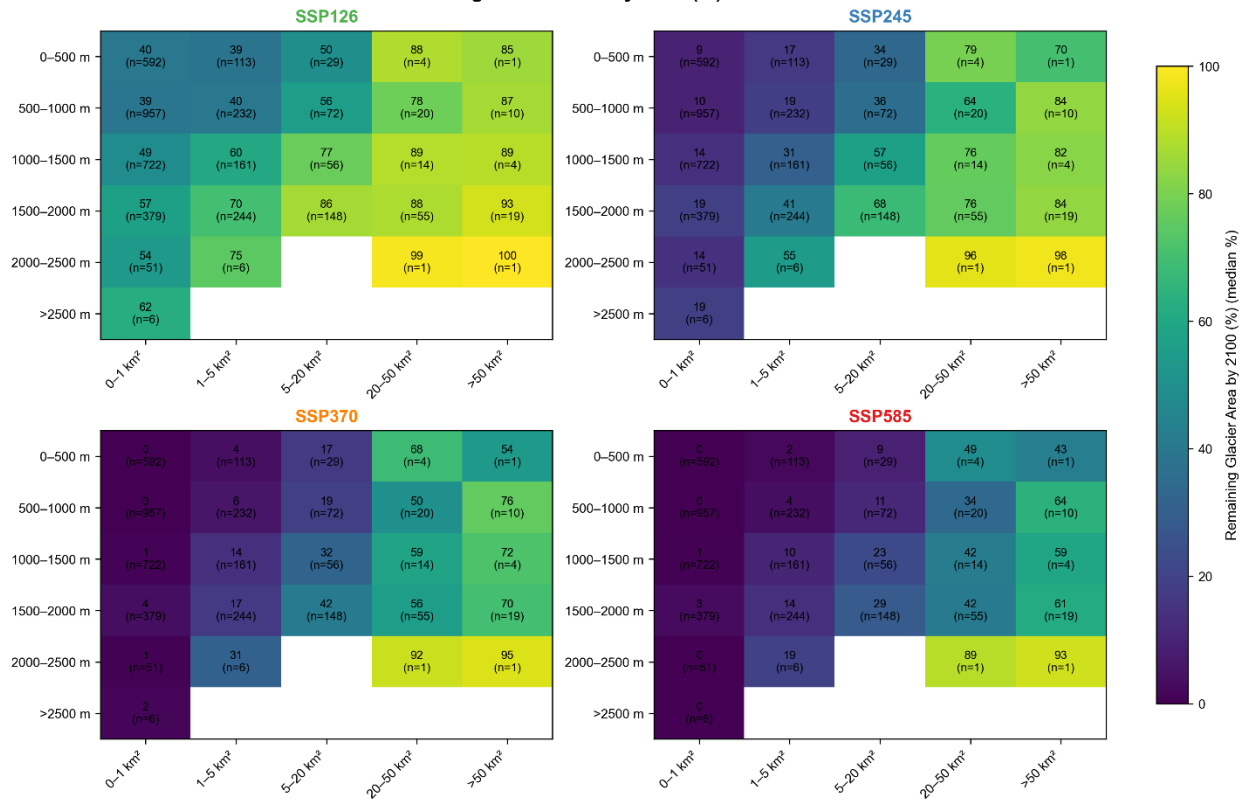

### Remaining Glacier Area by 2100 (%) — Central-West

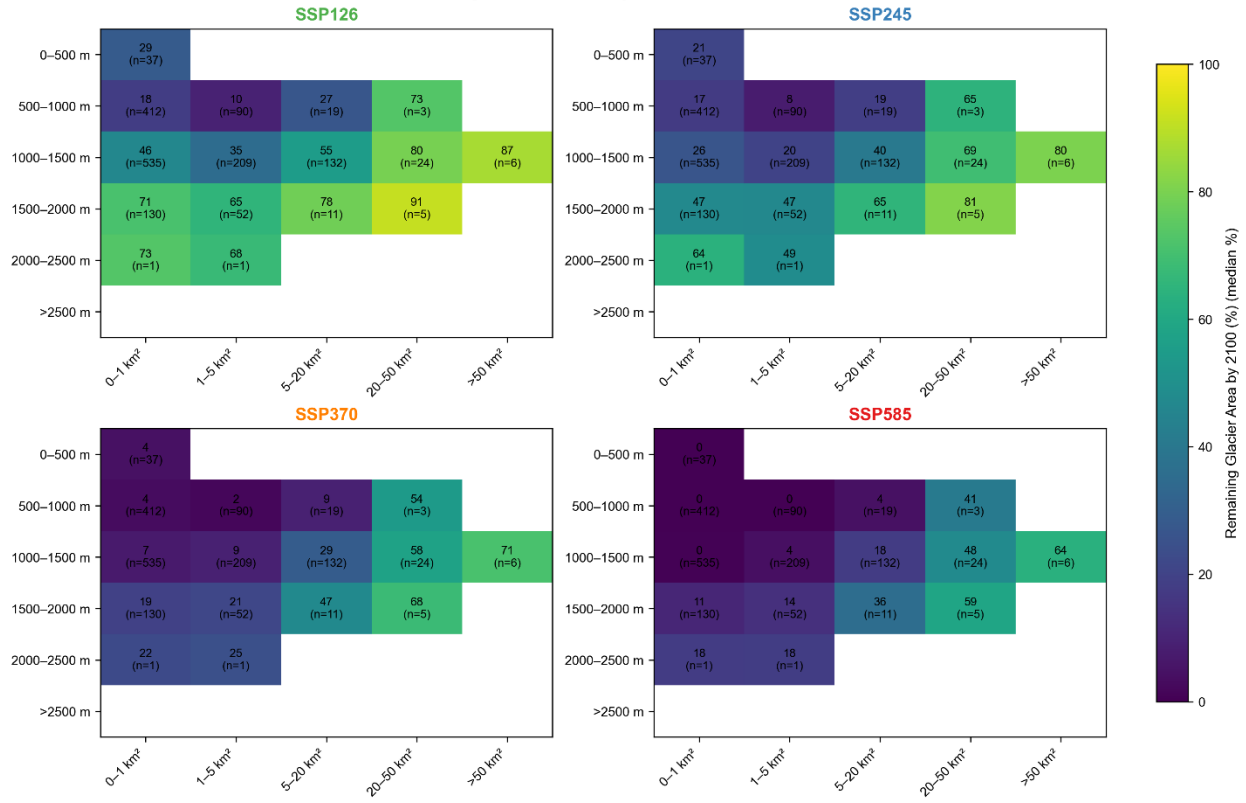

### Remaining Glacier Area by 2100 (%) — South-East

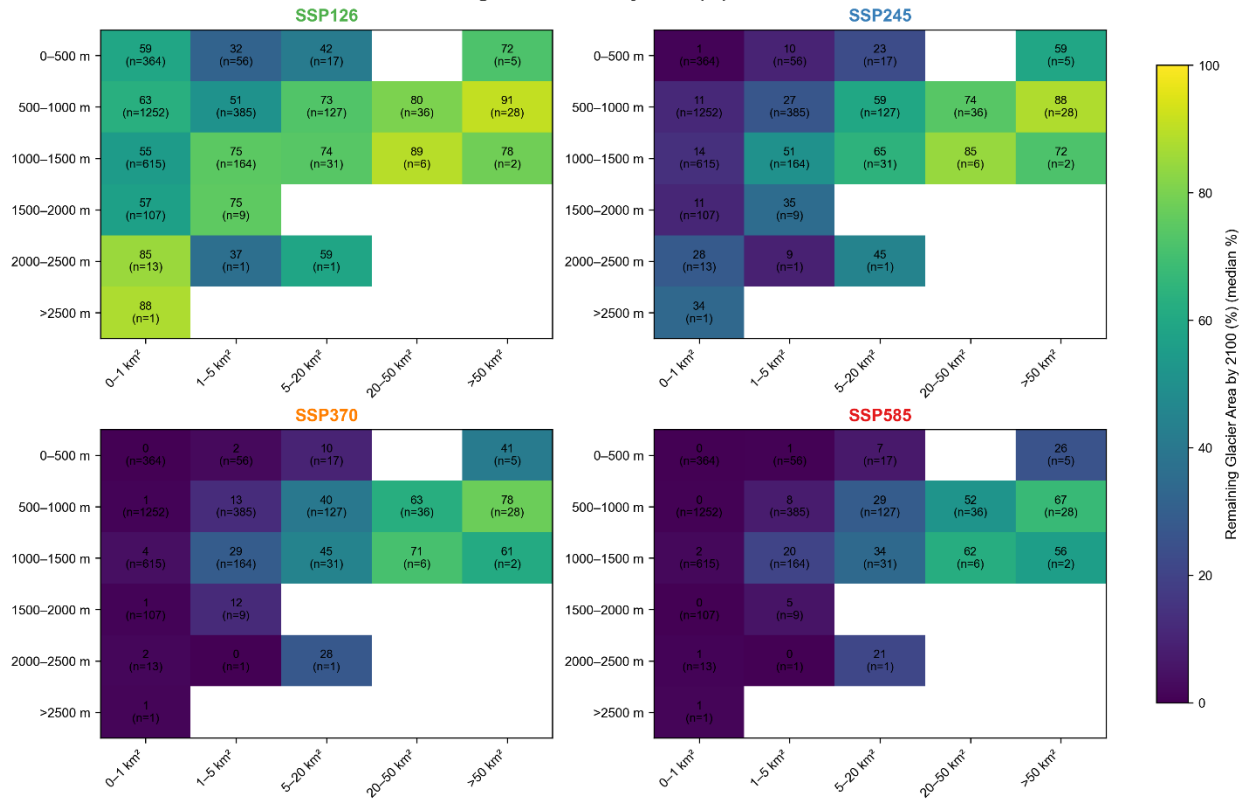

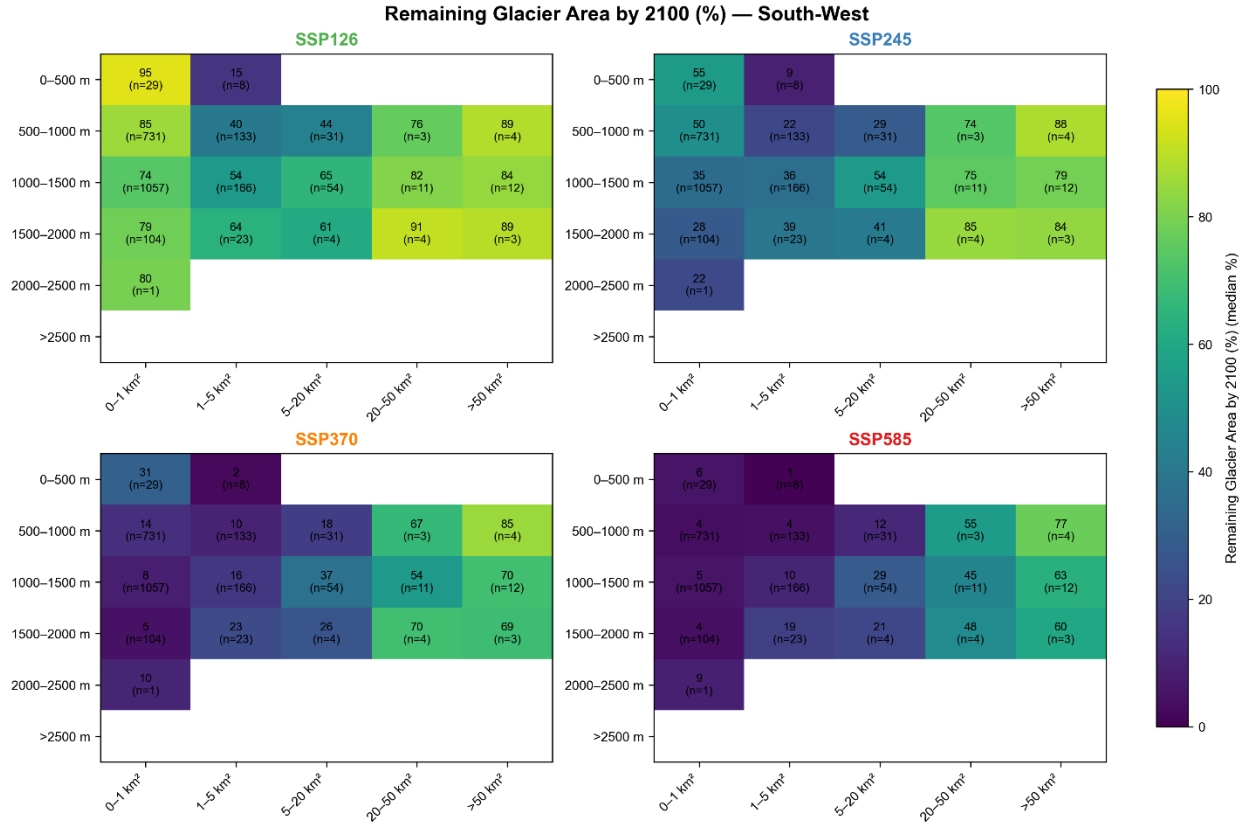

## Sect. S4.2. Remaining Glacier Volume

**Figure S11-S18. Remaining Glacier Volume by 2100 (%) across subregions and emission scenarios.** Same as Figures S3–S10, but showing the projected remaining glacier volume by 2100 relative to 2020 for each subregion under four SSP scenarios. Glaciers are binned by initial area (x-axis) and median elevation (y-axis). Values inside the grid cells indicate the median percentage of remaining glacier volume by 2100, with the number of glaciers in parentheses.

### Remaining Glacier Volume by 2100 (%) — Greenland - All

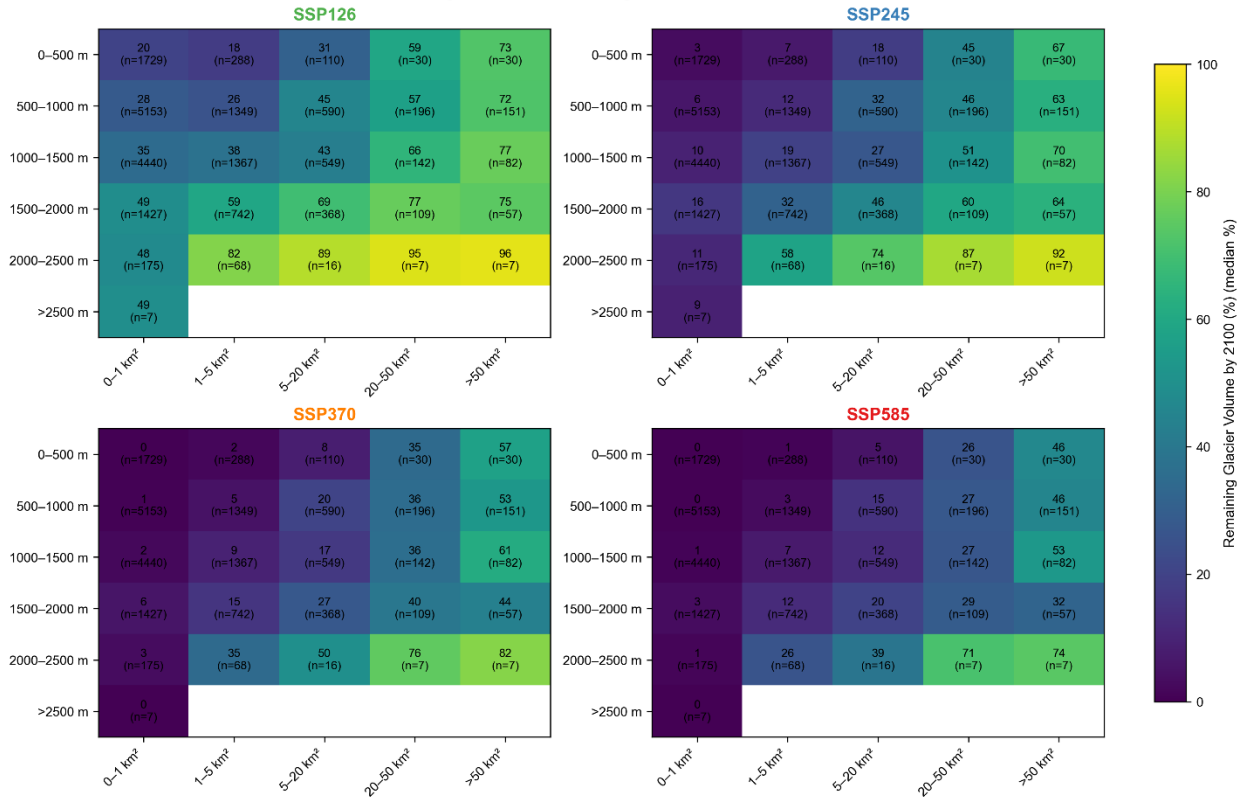

### Remaining Glacier Volume by 2100 (%) — North

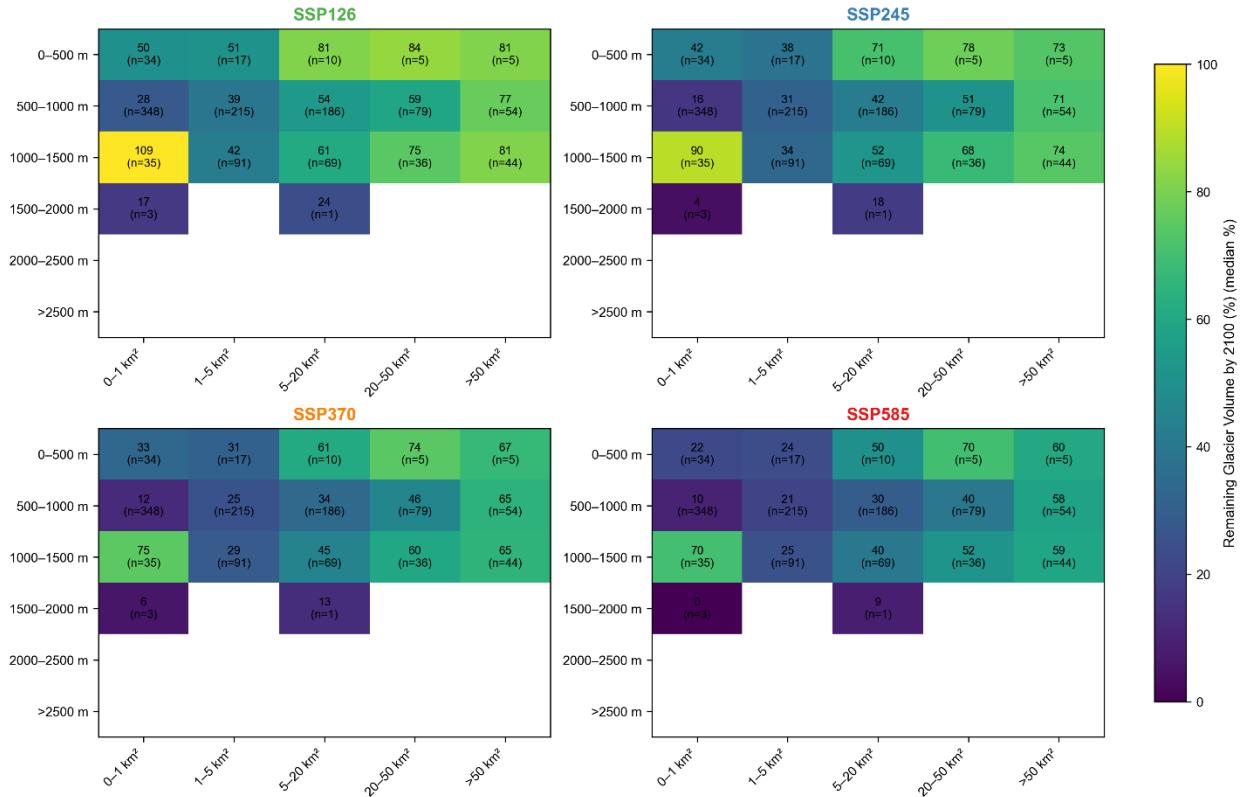

### Remaining Glacier Volume by 2100 (%) — North-East

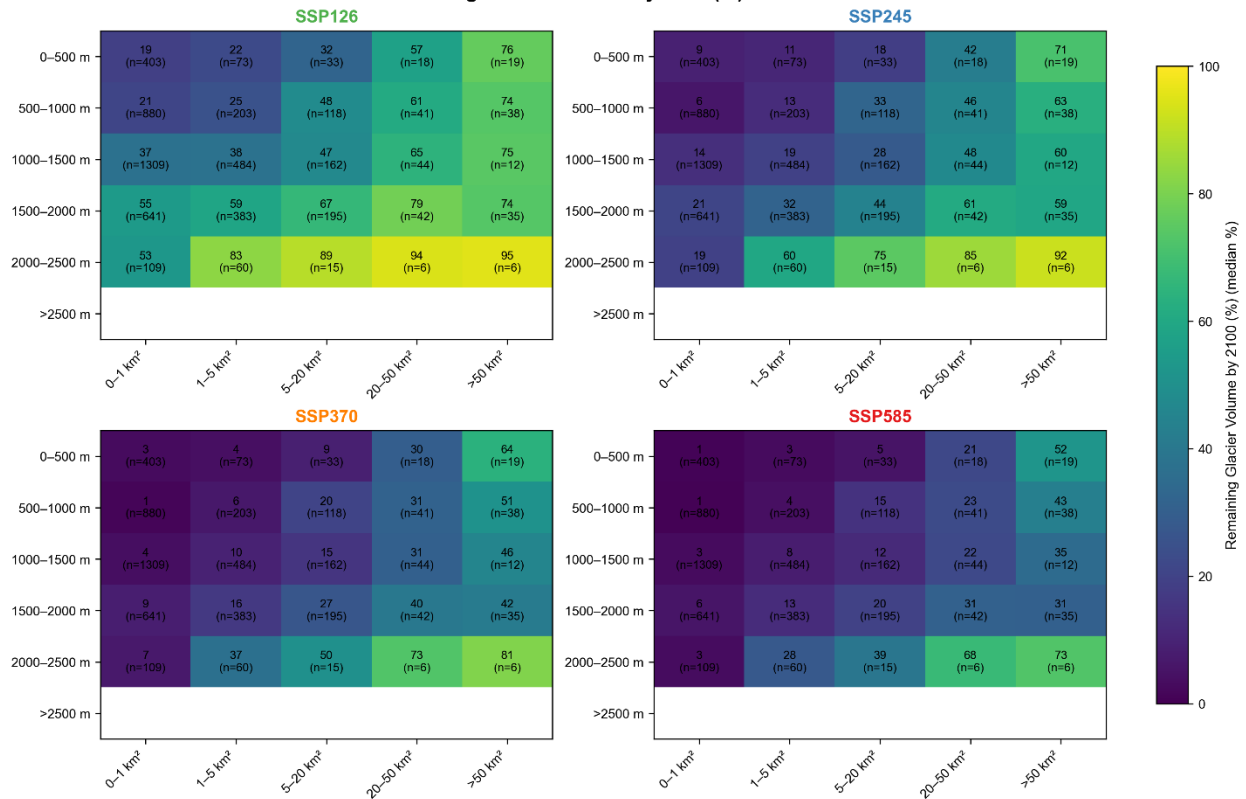

### Remaining Glacier Volume by 2100 (%) — North-West

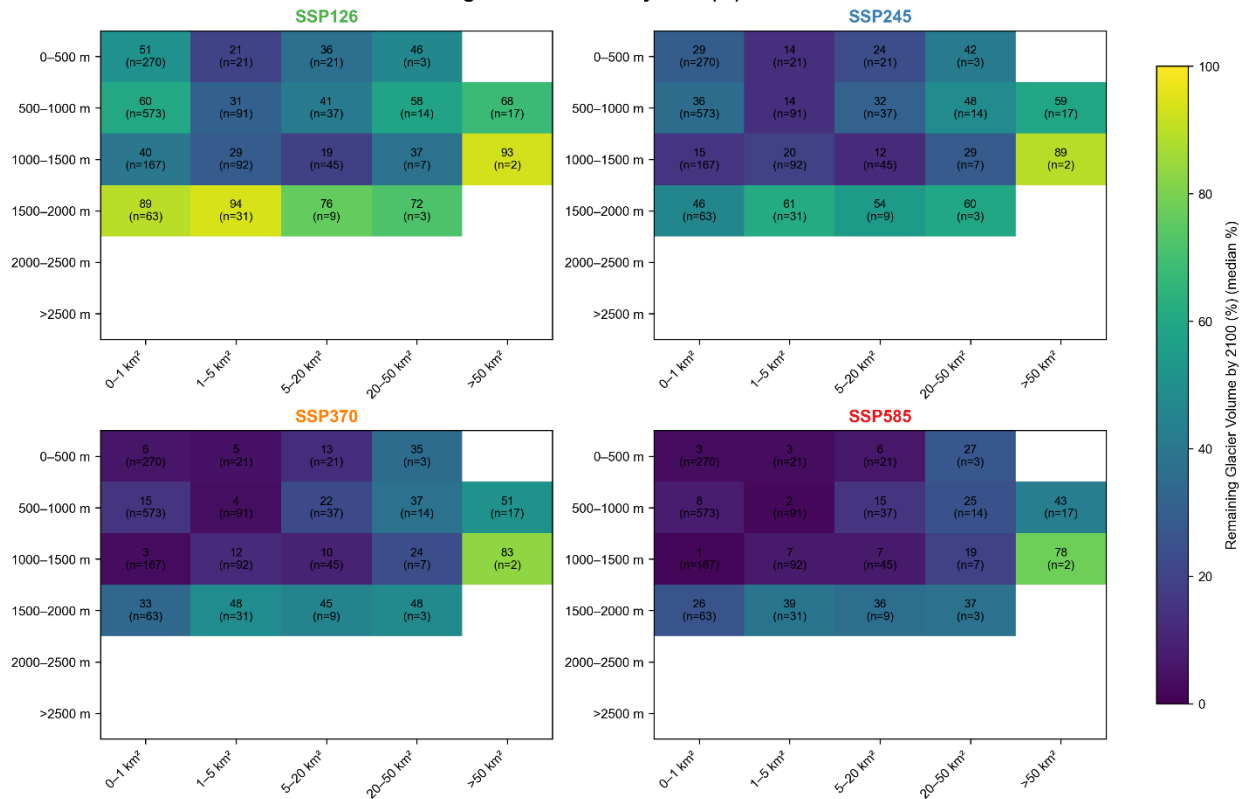

### Remaining Glacier Volume by 2100 (%) — Central-East

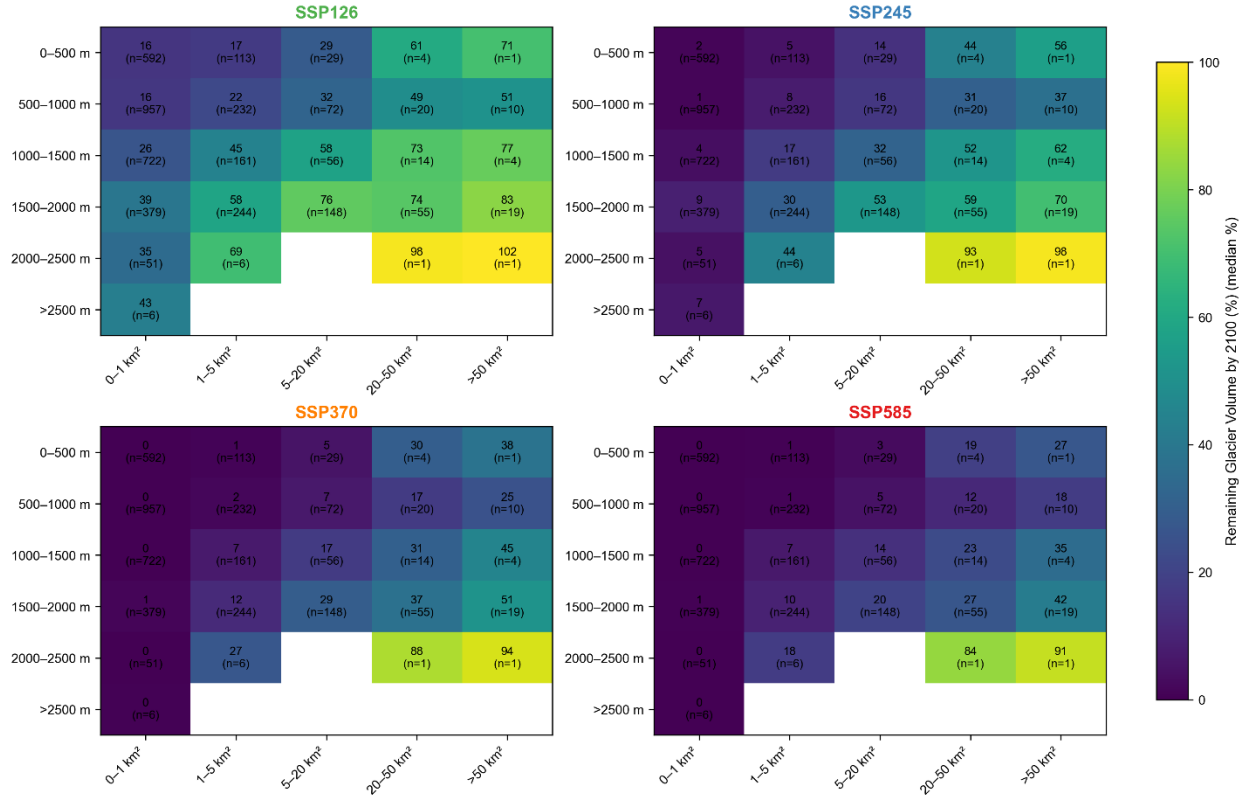

### Remaining Glacier Volume by 2100 (%) — Central-West

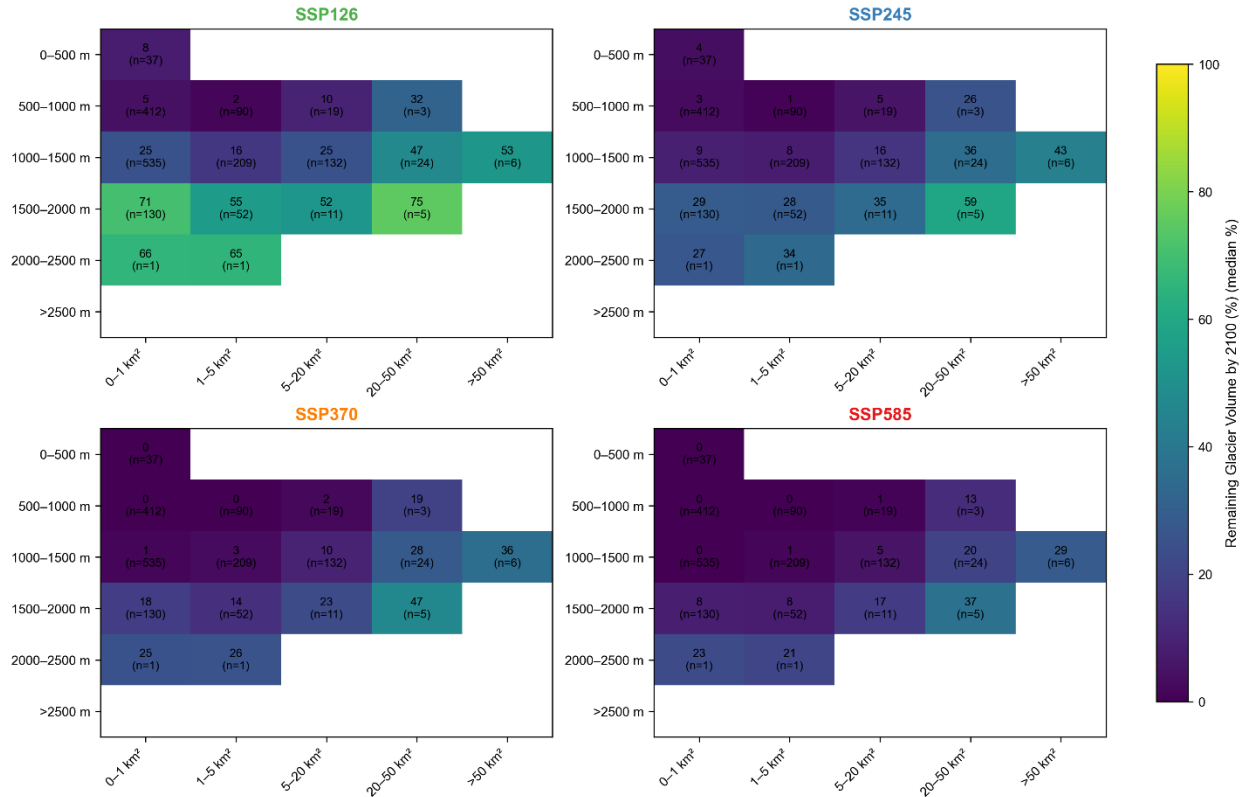

### Remaining Glacier Volume by 2100 (%) — South-East

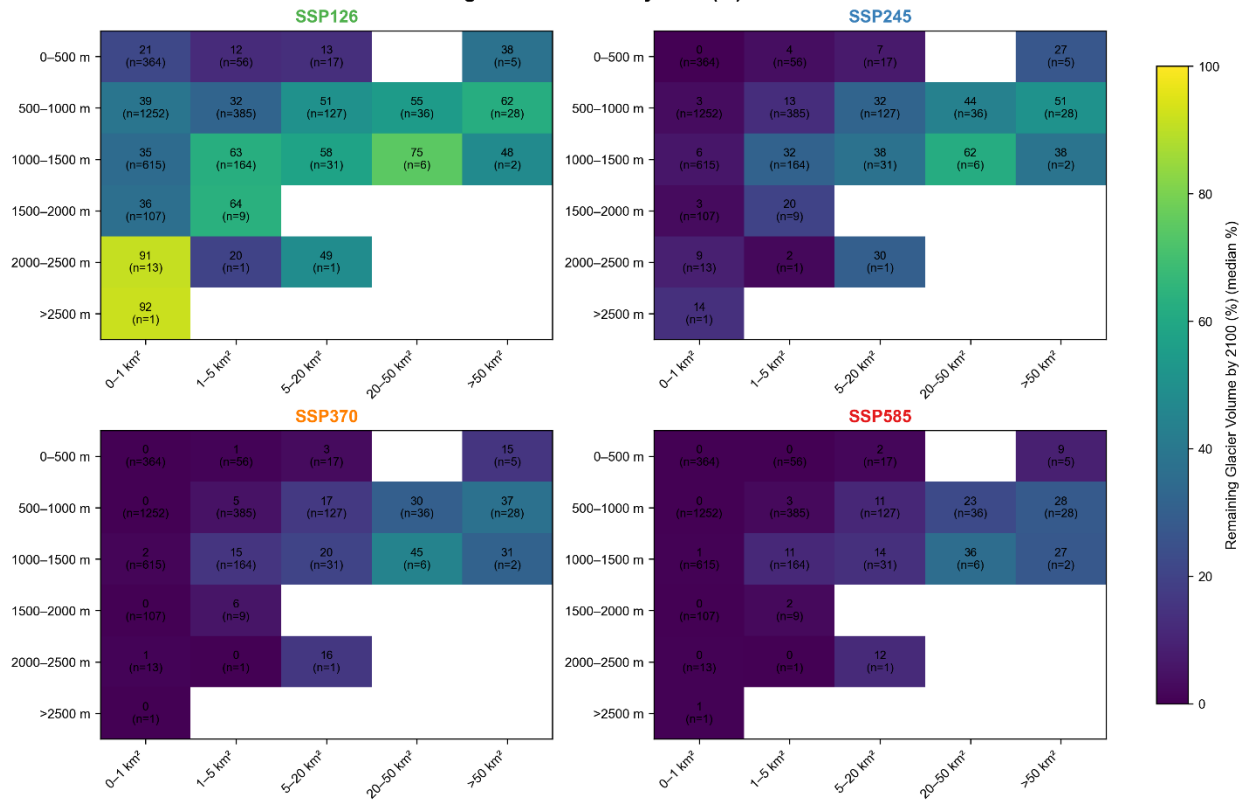

### Remaining Glacier Volume by 2100 (%) — South-West

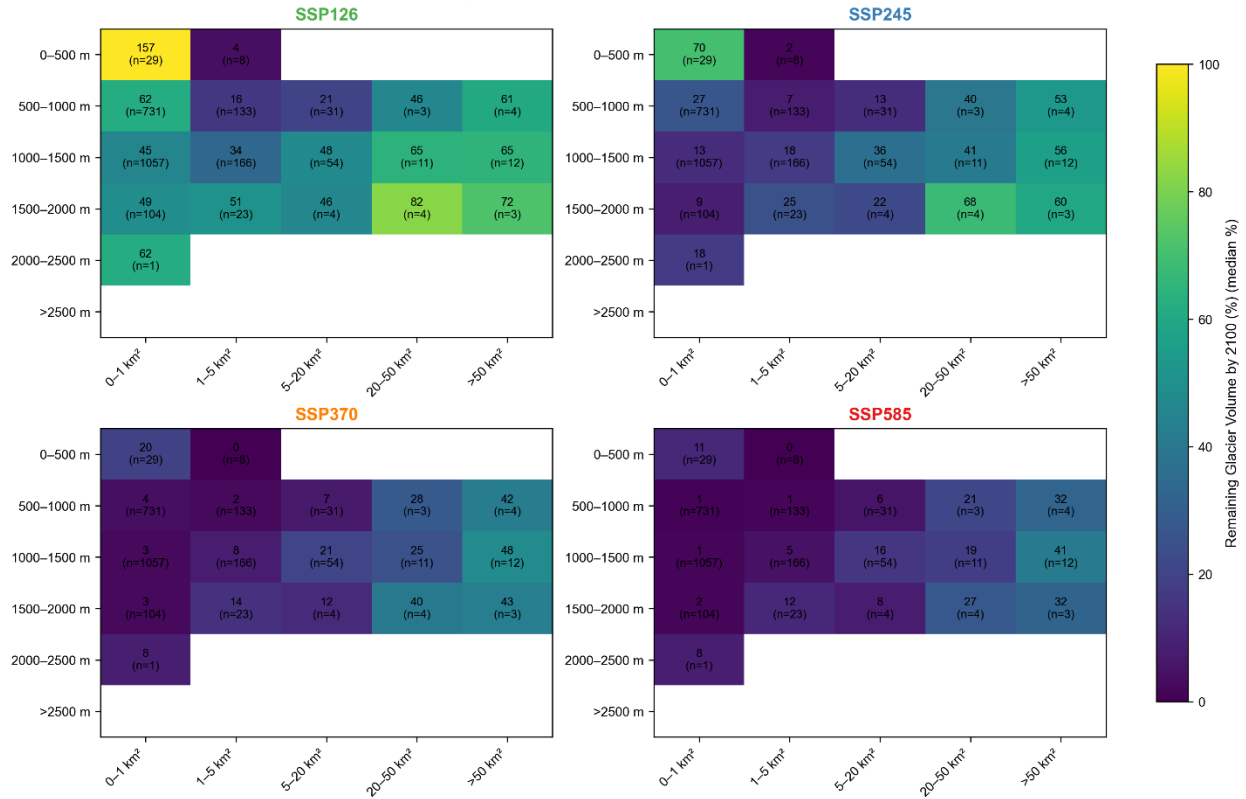

### Sect. S5. Comparisons with other studies

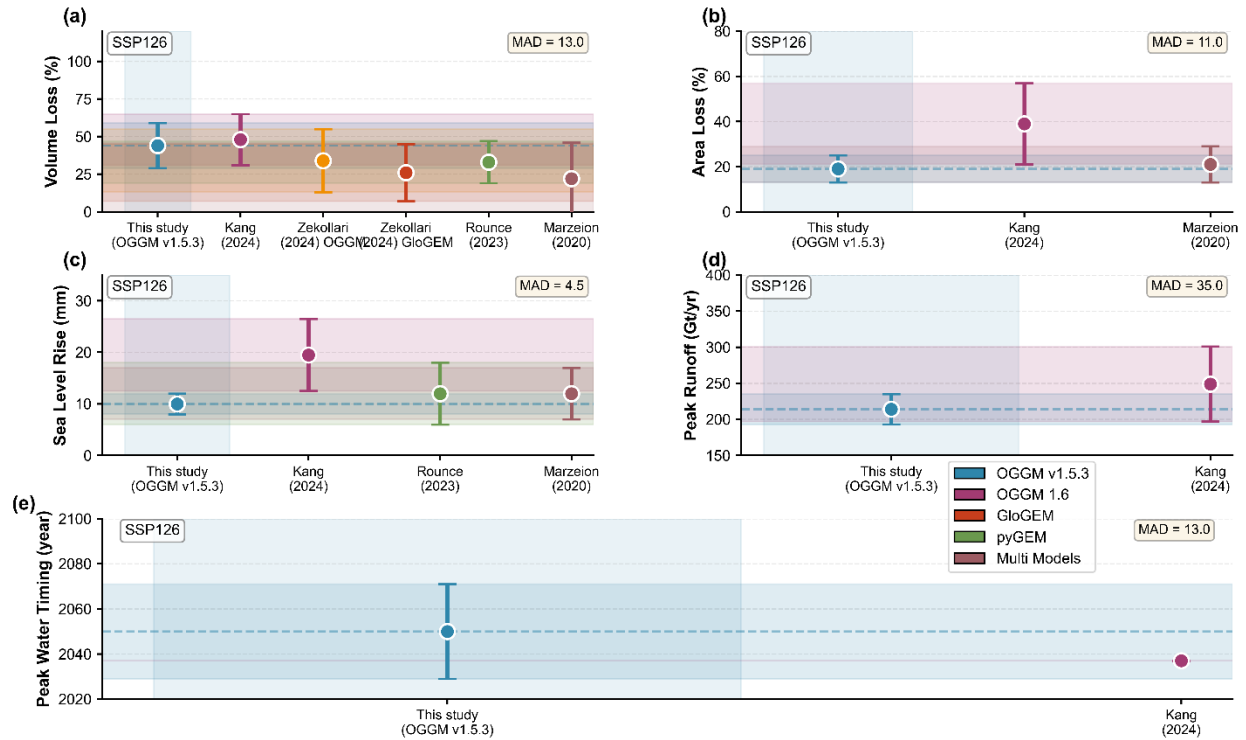

**Figure S19.** Multi-model comparison of projected changes for Greenlands peripheral glaciers under SSP126 scenario.

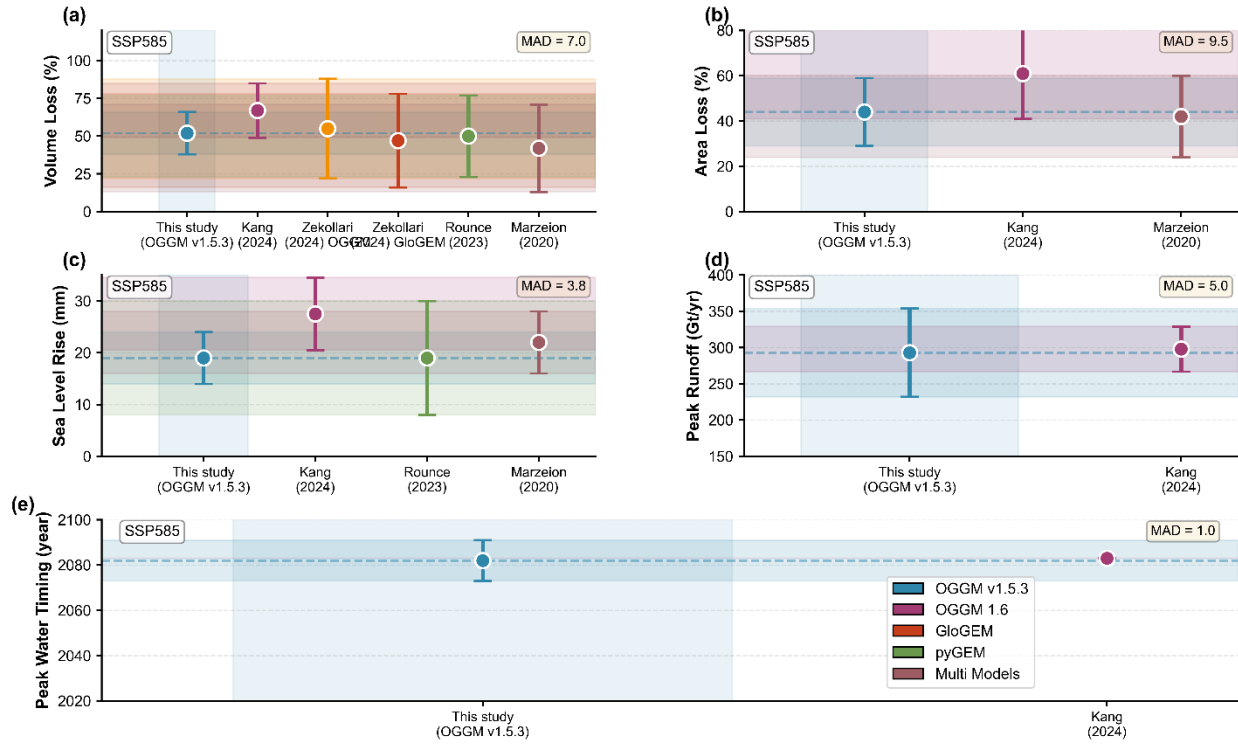

**Figure S20.** Multi-model comparison of projected changes for Greenlands peripheral glaciers under SSP585 scenario. Studies included: Marzeion et al. (2020); Rounce et al. (2023); Zekollari et al. (2024); Kang et al. (2024)

**Table S2.** Statistical metrics comparing projections across glacier models. MAD = Mean Absolute Difference, CV = Coefficient of Variation (OGGM-based studies only), Overlap Range = minimum to maximum confidence interval overlap with individual studies.

| Metric                  | Scenario | MAD (All Studies) | MAD (OGGM Only) | CV (OGGM) | Overlap Range (%) |
|-------------------------|----------|-------------------|-----------------|-----------|-------------------|
| Volume Loss (%)         | SSP126   | 13.0              | 7.0             | 0.140     | 28-78             |
|                         | SSP585   | 7.0               | 9.0             | 0.112     | 36-52             |
| Area Loss (%)           | SSP126   | 11.0              | 20.0            | 0.345     | 9-75              |
|                         | SSP585   | 9.5               | 17.0            | 0.162     | 35-83             |
| SLR (mm)                | SSP126   | 4.5               | 9.5             | 0.322     | 33-40             |
|                         | SSP585   | 3.8               | 8.5             | 0.183     | 17-57             |
| Peak Runoff (Gt/yr)     | SSP126   | 35.0              | -               | -         | -                 |
|                         | SSP585   | 5.0               | -               | -         | -                 |
| Peakwater Timing (year) | SSP126   | 13.0              | -               | -         | -                 |
|                         | SSP585   | 1.0               | -               | -         | -                 |

## References

- Cuffey, K. M. and Paterson, W. S. B.: The Physics of Glaciers, Academic Press, 2010.
- Glen, J. W.: The creep of polycrystalline ice, Proceedings of the Royal Society of London. Series A. Mathematical and Physical Sciences 1175, London, <https://doi.org/10.1098/rspa.1955.0066>, 1955.
- Kang, L., Ding, M., Wang, Y., Sun, W., Wang, L., An, H., Zhang, Q., Che, J., and Huai, B.: Projected changes of Greenland's periphery glaciers and ice caps, Environmental Research Letters, 19, 10.1088/1748-9326/ad8b5f, 2024.
- Malles, J.-H., Maussion, F., Ultee, L., Kochtitzky, W., Copland, L., and Marzeion, B.: Exploring the impact of a frontal ablation parameterization on projected 21st-century mass change for Northern Hemisphere glaciers, Journal of Glaciology, 1-16, 10.1017/jog.2023.19, 2023.
- Marzeion, B., Hock, R., Anderson, B., Bliss, A., Champollion, N., Fujita, K., Huss, M., Immerzeel, W. W., Kraaijenbrink, P., Malles, J. H., Maussion, F., Radić, V., Rounce, D. R., Sakai, A., Shannon, S., van de Wal, R., and Zekollari, H.: Partitioning the Uncertainty of Ensemble Projections of Global Glacier Mass Change, Earths Future, 8, 10.1029/2019ef001470, 2020.
- Maussion, F., Butenko, A., Champollion, N., Dusch, M., Eis, J., Fourteau, K., Gregor, P., Jarosch, A. H., Landmann, J., Oesterle, F., Recinos, B., Rothenpieler, T., Vlug, A., Wild, C. T., and Marzeion, B.: The Open Global Glacier Model (OGGM) v1.1, Geoscientific Model Development, 12, 909-931, 10.5194/gmd-12-909-2019, 2019.
- Rounce, D. R., Hock, R., Maussion, F., Hugonnet, R., Kochtitzky, W., Huss, M., Berthier, E., Brinkerhoff, D., Compagno, L., Copland, L., Farinotti, D., Menounos, B., and McNabb, R. W.: Global glacier change in the 21st century: Every increase in temperature matters, Science, 379, 78-83, 10.1126/science.abo1324, 2023.
- Zekollari, H., Huss, M., Schuster, L., Maussion, F., Rounce, D. R., Aguayo, R., Champollion, N., Compagno, L., Hugonnet, R., Marzeion, B., Mojtavavi, S., and Farinotti, D.: Twenty-first century global glacier evolution under CMIP6 scenarios and the role of glacier-specific observations, The Cryosphere, 18, 5045-5066, 10.5194/tc-18-5045-2024, 2024.
